# Supplementary material for: Scaling in Free-Swimming Fish and Implications for Measuring Size-at-Time in the Wild
Source: PubMed Central journal article supplement (PMC4684220; doi:10.1371/journal.pone.0144875), 2015-12-16
Supplement: pone.0144875.s001.pdf [file pone.0144875.s001.pdf]

**Input** lateral acceleration  $D_{nx1}$

**Step 1** IIR low-pass filter (15Hz cut-off)

**Step 2** Find zero-crossing intervals ( $\Delta t$ ) in overlapping windows,  $i$  ( $i = 1, \dots, N$ ) of species-specific window length,  $W$

**Step 3** Determine window stability by comparing threshold  $ThS^*$  to  $\sigma(\Delta t)_i$

If  $\sigma(\Delta t)_i < ThS^* \rightarrow$  TBF in window stable

If  $\sigma(\Delta t)_i > ThS^* \rightarrow$  TBF in window unstable, discarded

**Step 3** Determine window similarity by comparing  $E(\Delta t)_i$  and  $E(\Delta t)_{i+1}$  by non-parametric statistical tests

If  $E(\Delta t)_i = E(\Delta t)_{i+1} \rightarrow$  window combined

If  $E(\Delta t)_i \neq E(\Delta t)_{i+1} \rightarrow$  windows separate

**Output** List of frequencies and corresponding window lengths
